# Supplementary material for: Avelumab in patients with previously treated metastatic melanoma: phase 1b results from the JAVELIN Solid Tumor trial
Source: PubMed Central journal article supplement (PMC6335739; doi:10.1186/s40425-018-0459-y), 2019-01-16
Supplement: 40425_2018_459_MOESM3_ESM.pdf [file 40425_2018_459_MOESM3_ESM.pdf]

**Additional file 3: Table S2.** Response and outcomes in patients with non-ocular melanoma according to PD-L1 status.

| Patients with non-ocular melanoma (n=35) |                                          |                  |                      |
|------------------------------------------|------------------------------------------|------------------|----------------------|
| Outcome                                  | PD-L1 expression<br>(≥1% of tumor cells) |                  |                      |
|                                          | Positive<br>n=14                         | Negative<br>n=12 | Not evaluable<br>n=9 |
| ORR (95% CI), %                          | 57.1 (28.9-82.3)                         | 0 (0-26.5)       | 33.3 (7.5-70.1)      |
| PFS                                      |                                          |                  |                      |
| Median (95% CI), months                  | 7.9 (1.3-NE)                             | 1.3 (1.1-6.3)    | 3.7 (1.4-NE)         |
| 6-month rate (95% CI), %                 | 64.3 (34.3-83.3)                         | 23.3 (3.6-52.9)  | 42.9 (9.8-73.4)      |
| 12-month rate (95% CI), %                | 33.3 (10.9-58.0)                         | 0 (NE-NE)        | 42.9 (9.8-73.4)      |
| OS                                       |                                          |                  |                      |
| Median (95% CI), months                  | 24.9 (6.2-NE)                            | 4.9 (3.8-12.9)   | NE (18.5-NE)         |
| 6-month rate (95% CI), %                 | 85.7 (53.9-96.2)                         | 39.3 (9.3-69.3)  | 100 (NE-NE)          |
| 12-month rate (95% CI), %                | 71.4 (40.6-88.2)                         | 26.2 (3.9-57.5)  | 100 (NE-NE)          |
| 24-month rate (95% CI), %                | 55.1 (25.5-77.1)                         | 0 (NE-NE)        | 80.0 (20.4-96.9)     |
