# Supplementary material for: Avelumab in patients with previously treated metastatic melanoma: phase 1b results from the JAVELIN Solid Tumor trial
Source: PubMed Central journal article supplement (PMC6335739; doi:10.1186/s40425-018-0459-y), 2019-01-16

**Additional file 5: Figure S3.** PFS (A) and OS (B) in patients with non-ocular melanoma according to tumor PD-L1 expression (n=35).

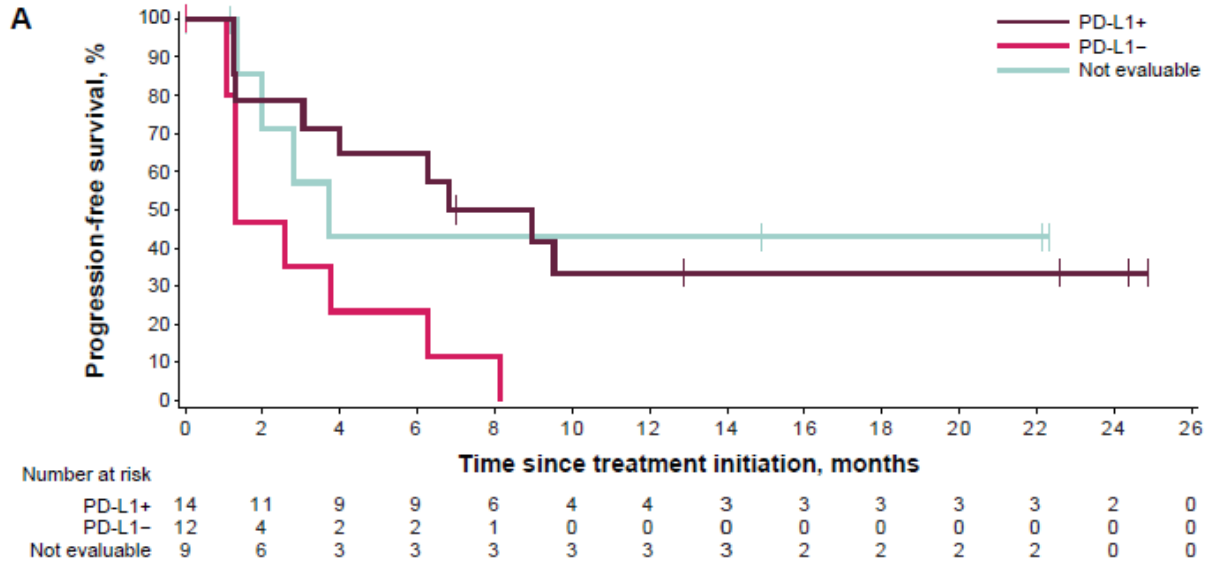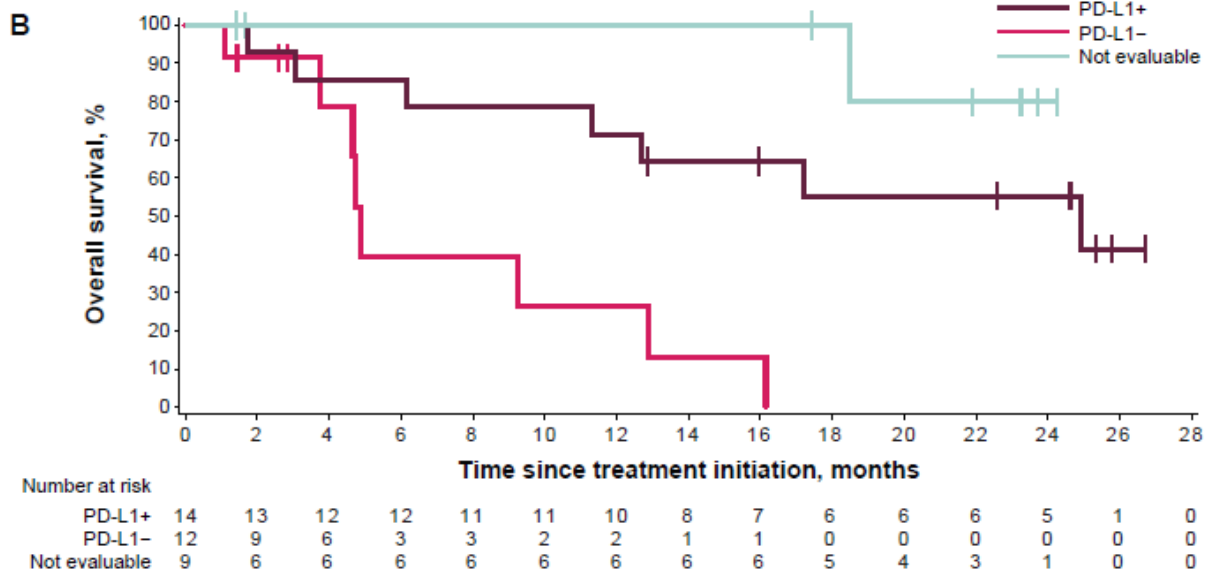

Supplement: 40425_2018_459_MOESM5_ESM.pdf [file 40425_2018_459_MOESM5_ESM.pdf]
