# Supplementary material for: Avelumab in patients with previously treated metastatic melanoma: phase 1b results from the JAVELIN Solid Tumor trial
Source: PubMed Central journal article supplement (PMC6335739; doi:10.1186/s40425-018-0459-y), 2019-01-16
Supplement: 40425_2018_459_MOESM7_ESM.pdf [file 40425_2018_459_MOESM7_ESM.pdf]

**Additional file 7: Table S4.** All serious adverse events (N=51).

| <b>Primary system organ class<br/>MedDRA preferred term</b>                  | <b>All causality,<br/>n (%)</b> |
|------------------------------------------------------------------------------|---------------------------------|
| Patients with ≥1 event                                                       | 24 (47.1)                       |
| General disorders and administration site conditions                         |                                 |
| Disease progression                                                          | 3 (5.9)                         |
| Pyrexia                                                                      | 3 (5.9)                         |
| Asthenia                                                                     | 2 (3.9)                         |
| General physical health deterioration                                        | 1 (2.0)                         |
| Cardiac disorders                                                            |                                 |
| Atrial fibrillation                                                          | 2 (3.9)                         |
| Cardiac arrest                                                               | 1 (2.0)                         |
| Myocardial infarction                                                        | 1 (2.0)                         |
| Gastrointestinal disorders                                                   |                                 |
| Gastrointestinal hemorrhage                                                  | 2 (3.9)                         |
| Vomiting                                                                     | 2 (3.9)                         |
| Nausea                                                                       | 1 (2.0)                         |
| Esophagitis                                                                  | 1 (2.0)                         |
| Metabolism and nutrition disorders                                           |                                 |
| Dehydration                                                                  | 1 (2.0)                         |
| Hyperglycemia                                                                | 1 (2.0)                         |
| Hyperuricemia                                                                | 1 (2.0)                         |
| Hypoglycemia                                                                 | 1 (2.0)                         |
| Respiratory, thoracic, and mediastinal disorders                             |                                 |
| Dyspnea                                                                      | 1 (2.0)                         |
| Pleural effusion                                                             | 1 (2.0)                         |
| Pulmonary hemorrhage                                                         | 1 (2.0)                         |
| Infections and infestations                                                  |                                 |
| Cellulitis                                                                   | 1 (2.0)                         |
| Pneumonia                                                                    | 1 (2.0)                         |
| Injury, poisoning, and procedural complications                              |                                 |
| Fall                                                                         | 1 (2.0)                         |
| Infusion-related reaction                                                    | 1 (2.0)                         |
| Neoplasms benign, malignant, and unspecified<br>(including cysts and polyps) |                                 |
| Metastasis                                                                   | 2 (3.9)                         |
| Nervous system disorders                                                     |                                 |
| Sensorimotor disorder                                                        | 1 (2.0)                         |
| Syncope                                                                      | 1 (2.0)                         |
| Renal and urinary disorders                                                  |                                 |
| Acute kidney injury                                                          | 1 (2.0)                         |
| Hematuria                                                                    | 1 (2.0)                         |
| Blood and lymphatic system disorders                                         |                                 |
| Anemia                                                                       | 1 (2.0)                         |
| Hepatobiliary disorders                                                      |                                 |
| Cholecystitis                                                                | 1 (2.0)                         |
| Immune system disorders                                                      |                                 |
| Sarcoidosis                                                                  | 1 (2.0)                         |

|                                                |         |
|------------------------------------------------|---------|
| Psychiatric disorders<br>Mental status changes | 1 (2.0) |
| Skin and subcutaneous disorders<br>Skin ulcer  | 1 (2.0) |
